# Supplementary material for: Preventing bacterial colonization using colloidal crystals
Source: Royal Society of Chemistry journal article supplement (doi:10.1039/c4tb00835a), 2014-01-01
Supplement: c4tb00835a1.pdf [file c4tb00835a1.pdf]

Electronic Supplementary Information for:

**Preventing Bacterial Colonization Using Colloidal Crystals**

Mehdi Kargar<sup>1</sup>, Amy Pruden<sup>2</sup>, and William A. Ducker<sup>3\*</sup>

<sup>1</sup>Department of Mechanical Engineering

<sup>2</sup>Via Department of Civil and Environmental Engineering

<sup>3</sup>Department of Chemical Engineering

Virginia Tech, Blacksburg VA 24061

Email address: [mehdik@vt.edu](mailto:mehdik@vt.edu), [apruden@vt.edu](mailto:apruden@vt.edu), [wducker@vt.edu](mailto:wducker@vt.edu).

**Table S1:** Percentage of element on the surface of each sample surface measured by XPS.

| <b>Sample Set 1</b> |                        |                       |                        |                       |
|---------------------|------------------------|-----------------------|------------------------|-----------------------|
| <b>Topography</b>   | <b>C<sub>1s</sub>*</b> | <b>O<sub>1s</sub></b> | <b>Si<sub>2p</sub></b> | <b>S<sub>2p</sub></b> |
| <b>Flat</b>         | 94.9                   | 4.6                   | 0.5                    | 0.0                   |
| <b>220 nm</b>       | 95.4                   | 4.5                   | 0.1                    | 0.1                   |
| <b>450 nm</b>       | 95.2                   | 4.6                   | 0.0                    | 0.2                   |
| <b>630 nm</b>       | 95.3                   | 4.6                   | 0.1                    | 0.1                   |
| <b>830 nm</b>       | 95.3                   | 4.5                   | 0.1                    | 0.1                   |
| <b>925 nm</b>       | 95.2                   | 4.7                   | 0.0                    | 0.1                   |
| <b>1550 nm</b>      | 95.0                   | 4.8                   | 0.0                    | 0.2                   |
| <b>Sample Set 2</b> |                        |                       |                        |                       |
| <b>Topography</b>   | <b>C<sub>1s</sub></b>  | <b>O<sub>1s</sub></b> | <b>Si<sub>2p</sub></b> | <b>S<sub>2p</sub></b> |
| <b>Flat</b>         | 98.1                   | 1.5                   | 0.4                    | 0.0                   |
| <b>220 nm</b>       | 99.2                   | 0.7                   | 0.1                    | 0.0                   |
| <b>450 nm</b>       | 98.8                   | 1.1                   | 0.0                    | 0.1                   |
| <b>830 nm</b>       | 98.7                   | 1.2                   | 0.0                    | 0.1                   |

\*Columns titles describe the electron orbital used to determine the element.

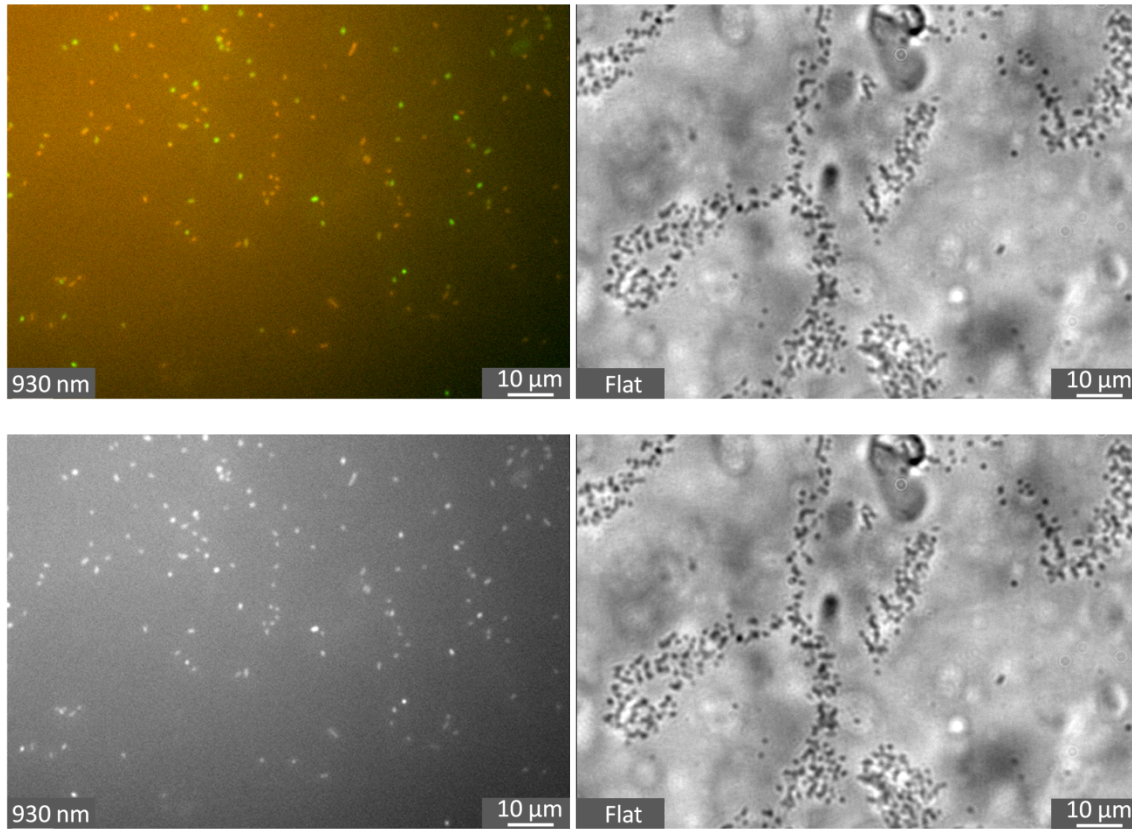

Figure S1: Original (top) and processed (bottom) images of *Pseudomonas aeruginosa* adhered to a Polystyrene surface coated with 930nm particles (left) and flat Polystyrene (right). The images were captured in a hydrated state. These images show that the colloidal crystal prevents formation of bacterial colonies: the images of the colloidal crystal show only individual bacteria whereas the images on the flat substrate are mainly in colonies.

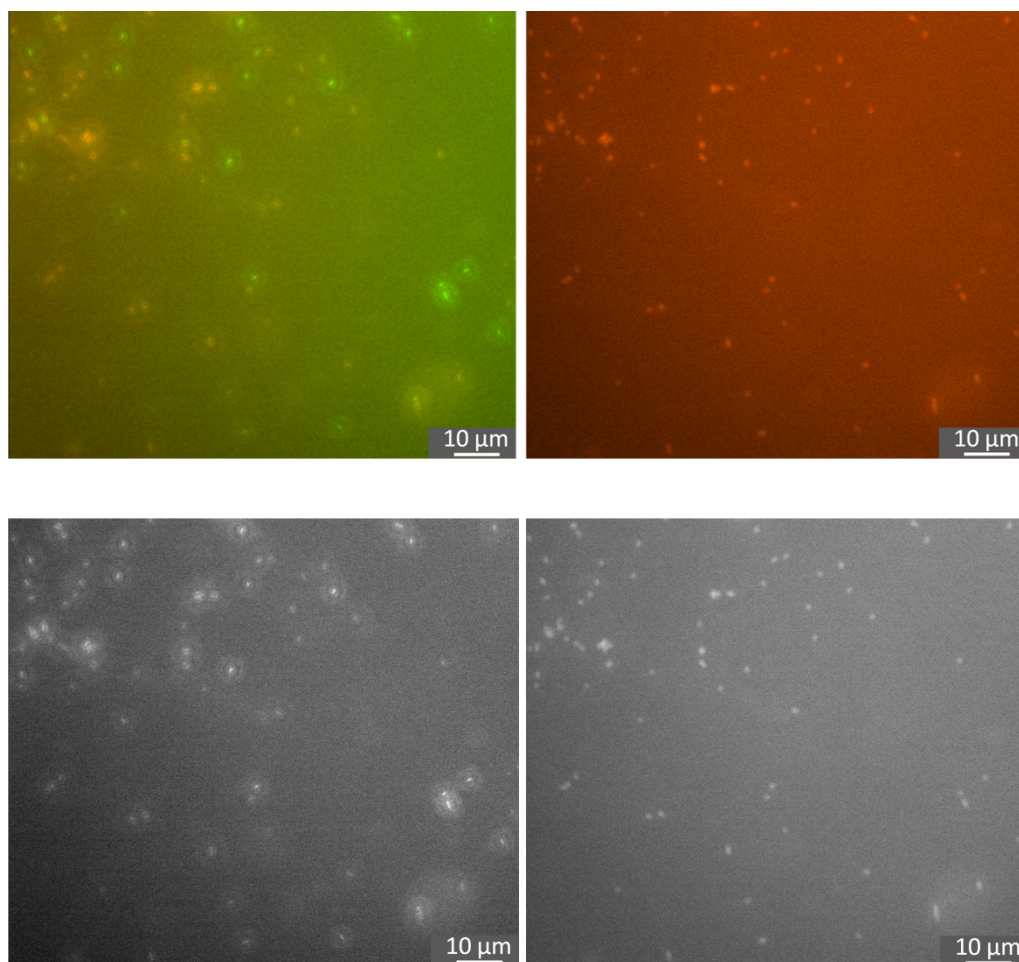

**Figure S2.** Fluorescence image of bacteria adsorbed to 1550 nm colloidal crystal. Left: In water. Right: after exchange of the water for ethanol then air drying for 3 hours. The original fluorescent images are on the top row and processed images are shown in the bottom row. Note that the position of each bacterium remains unchanged after each stage of preparation that is used for the SEM samples.

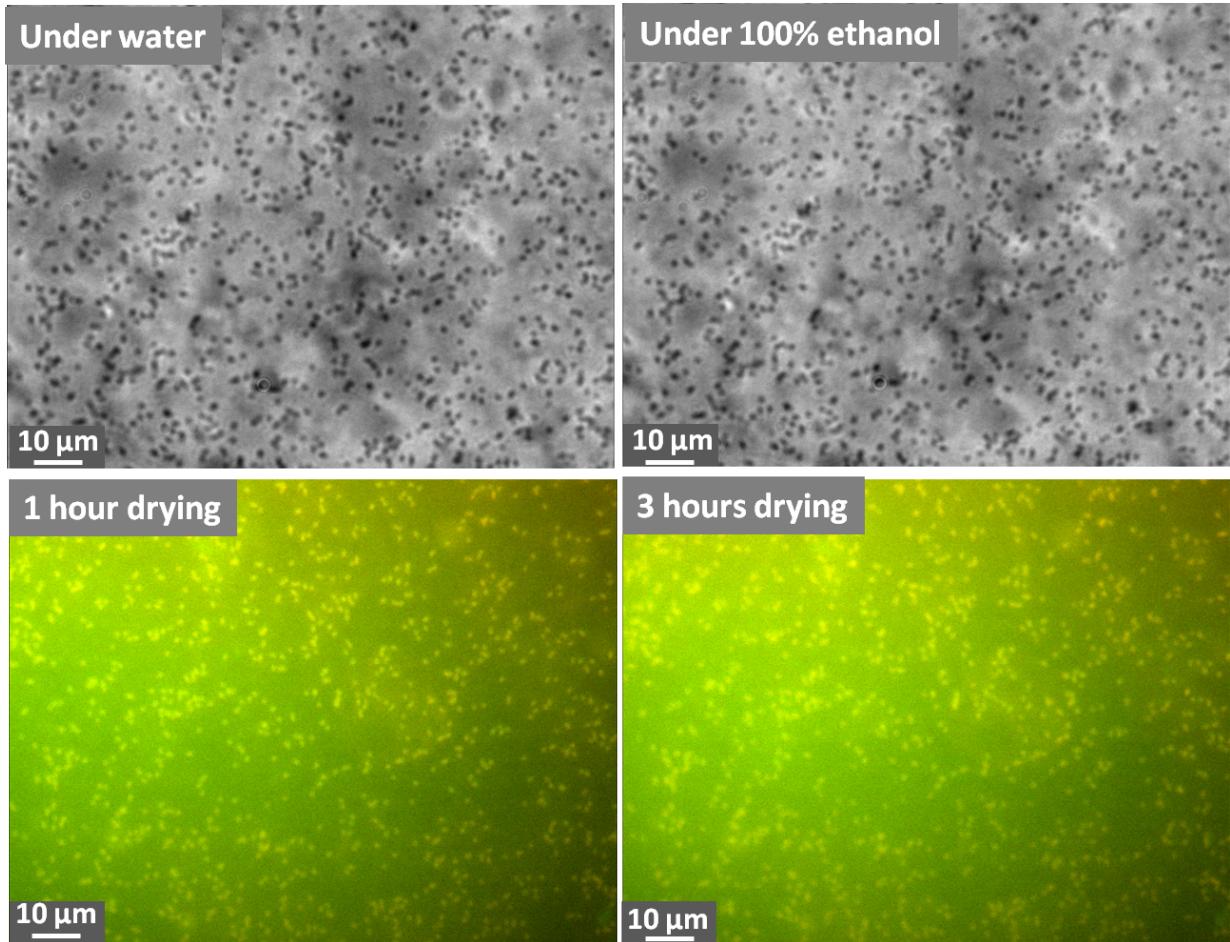

**Figure S3.** Sequence of fluorescence images of *P. aeruginosa* (PAO1) bacteria adsorbed to a flat sheet. The arrangement of bacteria in this image is not typical for *P. aeruginosa* on a flat polystyrene sheet. In a typical image of a flat surface, the bacteria are arranged in colonies as shown in Figure S1. This unusual area is shown so that one can examine whether the process of drying that is used prior to SEM imaging gives an artifact that looks like colony formation on a flat sheet. The sequence is: under water, then after replacement of the water with ethanol, then 1 hour of drying then 3 hours of drying. Note that the position of each bacterium remains unchanged after each stage of preparation that is used for the SEM samples: drying does not produce an artifact that looks like colony formation.

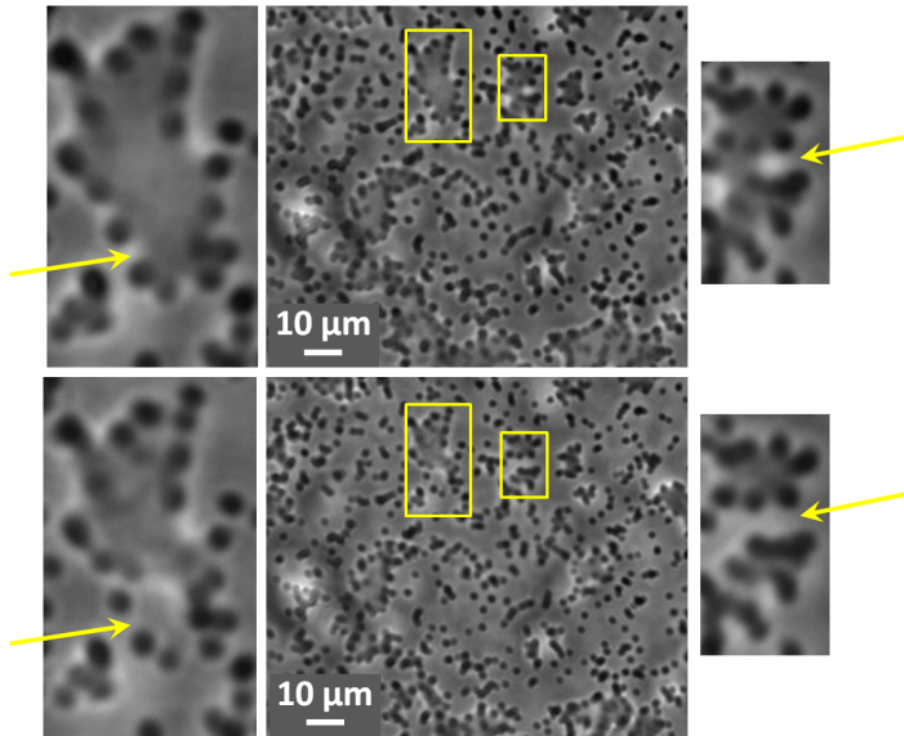

Figure S4 Optical images of *P. aeruginosa* adhered to the surface of polystyrene in water, washed with ethanol and dried for 1 hour (top) and 3 hours (bottom). Arrows point to a position where the interface moved past particles without changing their positions. The passage of the ethanol–air interface across the bacteria does not affect the position of the bacteria.
